# Supplementary material for: Discovery of Potent Sialic Acid Inhibitors Against the Hemagglutinin of Influenza A Virus
Source: Research Square preprint supplement (doi:10.21203/rs.3.rs-126042/v1), 2020-12-18
Supplement: Supplementary file 1 [file d4c9fc071148bf1832ea55ea.docx]

**Discovery of potent sialic acid inhibitors against the hemagglutinin of influenza A virus**

Yu-Jen Chang1,*, Cheng-Yun Yeh1,*, Ju-Chien Cheng2, Yu-Qi Huang2, Kai-Cheng Hsu3, Yu-Feng Lin4 & Chih-Hao Lu1,2,5

1The Ph.D. Program of Biotechnology and Biomedical industry, China Medical University, Taichung, Taiwan

2Department of Medical Laboratory Science and Biotechnology, China Medical University, Taichung, Taiwan

3Graduate Institute of Cancer Biology and Drug Discovery, Taipei Medical University, Taipei, Taiwan

4Department of Medical Laboratory Science and Biotechnology, Asia University, Taichung, Taiwan

5Graduate Institute of Biomedical Sciences, China Medical University, Taichung, Taiwan

# *These authors contributed equally to this work.

# Correspondence

Chih-Hao Lu, The Ph.D. Program of Biotechnology and Biomedical industry, China Medical University, No.91, Hsueh-Shih Road, Taichung, 40402, Taiwan

Email: [chlu@mail.cmu.edu.tw](mailto:chlu@mail.cmu.edu.tw)

**Table S1** The top twenty compounds are identified from virtual screening and ranked based on the SiMMap score.

| **Rank** | **Compounds** | **SiMMap Score** | **E1** | **H1** | **V1** | **Purchased** |
| --- | --- | --- | --- | --- | --- | --- |
| 1 | NSC97307 | 3.246 | 1 | 1 | 1 | V |
| 2 | NSC47717 | 3.207 | 1 | 1 | 1 | V |
| 3 | NSC4299 | 3.205 | 1 | 1 | 1 | V |
| 4 | NSC84472 | 3.205 | 1 | 1 | 1 | V |
| 5 | NSC85561 | 3.205 | 1 | 1 | 1 | V |
| 6 | NSC134131 | 3.201 | 1 | 1 | 1 | V |
| 7 | NSC45583 | 3.199 | 1 | 1 | 1 | V |
| 8 | NSC45208 | 3.196 | 1 | 1 | 1 | V |
| 9 | NSC715307 | 3.196 | 1 | 1 | 1 |  |
| 10 | NSC296652 | 3.193 | 1 | 1 | 1 |  |
| 11 | NSC621095 | 3.192 | 1 | 1 | 1 | V |
| 12 | NSC320860 | 2.273 | 0 | 1 | 1 |  |
| 13 | NSC104528 | 2.27 | 0 | 1 | 1 |  |
| 14 | NSC703071 | 2.269 | 0 | 1 | 1 |  |
| 15 | NSC622187 | 2.267 | 0 | 1 | 1 |  |
| 16 | NSC18193 | 2.263 | 0 | 1 | 1 |  |
| 17 | NSC46715 | 2.259 | 0 | 1 | 1 |  |
| 18 | NSC292236 | 2.258 | 0 | 1 | 1 |  |
| 19 | NSC305183 | 2.257 | 0 | 1 | 1 |  |
| 20 | NSC149033 | 2.255 | 0 | 1 | 1 |  |

**Table S2** The SMILES code of twelve derivative compounds and NSC85561.

| **Compounds** | **SMILES** |
| --- | --- |
| NSC326197 | C1=CC2=C(C=CC=C2S(=O)(=O)O)C(=C1)N=NC3=CC(=C(C=C3N)N)N=NC4=C(C=CC(=C4)[N+](=O)[O-])O |
| NSC45539 | C1=CC(=CC=C1N=NC2=C(C=CC3=CC(=CC(=C32)S(=O)(=O)O)S(=O)(=O)O)O)[N+](=O)[O-] |
| NSC45540 | C1=CC(=CC=C1N=NC2=C3C=CC(=CC3=CC(=C2O)S(=O)(=O)O)S(=O)(=O)O)[N+](=O)[O-] |
| NSC65820 | C1=CC2=C(C=CC(=C2N=NC3=C(C(=CC(=C3)[N+](=O)[O-])[N+](=O)[O-])O)O)C=C1S(=O)(=O)O |
| NSC45541 | C1=CC(=CC(=C1)[N+](=O)[O-])N=NC2=C3C=CC(=CC3=CC(=C2O)S(=O)(=O)O)S(=O)(=O)O |
| NSC45538 | C1=CC(=CC=C1N=NC2=C(C=CC3=C2C=CC(=C3)S(=O)(=O)O)O)[N+](=O)[O-] |
| NSC8647 | C1=CC2=CC(=C(C(=C2C(=C1)S(=O)(=O)O)O)N=NC3=CC=C(C=C3)[N+](=O)[O-])S(=O)(=O)O |
| NSC85561 | C1=CC=C2C(=C1)C=CC(=C2O)N=NC3=C4C=CC=C(C4=C(C=C3O)S(=O)(=O)[O-])[N+](=O)[O-] |
| NSC47715 | C1=CC=C2C(=C1)C=CC(=C2O)N=NC3=C(C=C(C4=CC=CC=C43)S(=O)(=O)O)O |
| NSC7223 | C1=CC=C2C(=C1)C=CC(=C2O)N=NC3=C4C=CC(=CC4=C(C=C3O)S(=O)(=O)O)[N+](=O)[O-] |
| NSC87862 | C1=CC=C2C(=C1)C(=CC(=C2N=NC3=C(C=C(C=C3)O)O)O)S(=O)(=O)O |
| NSC4203 | C1=CC=C2C(=C1)C=CC(=C2N=NC3=C(C=C(C4=CC=CC=C43)S(=O)(=O)O)O)O |
| NSC73413 | C1=CC=C2C(=C1)C=CC(=C2N=NC3=C4C=CC(=CC4=C(C=C3O)S(=O)(=O)[O-])[N+](=O)[O-])O |

#
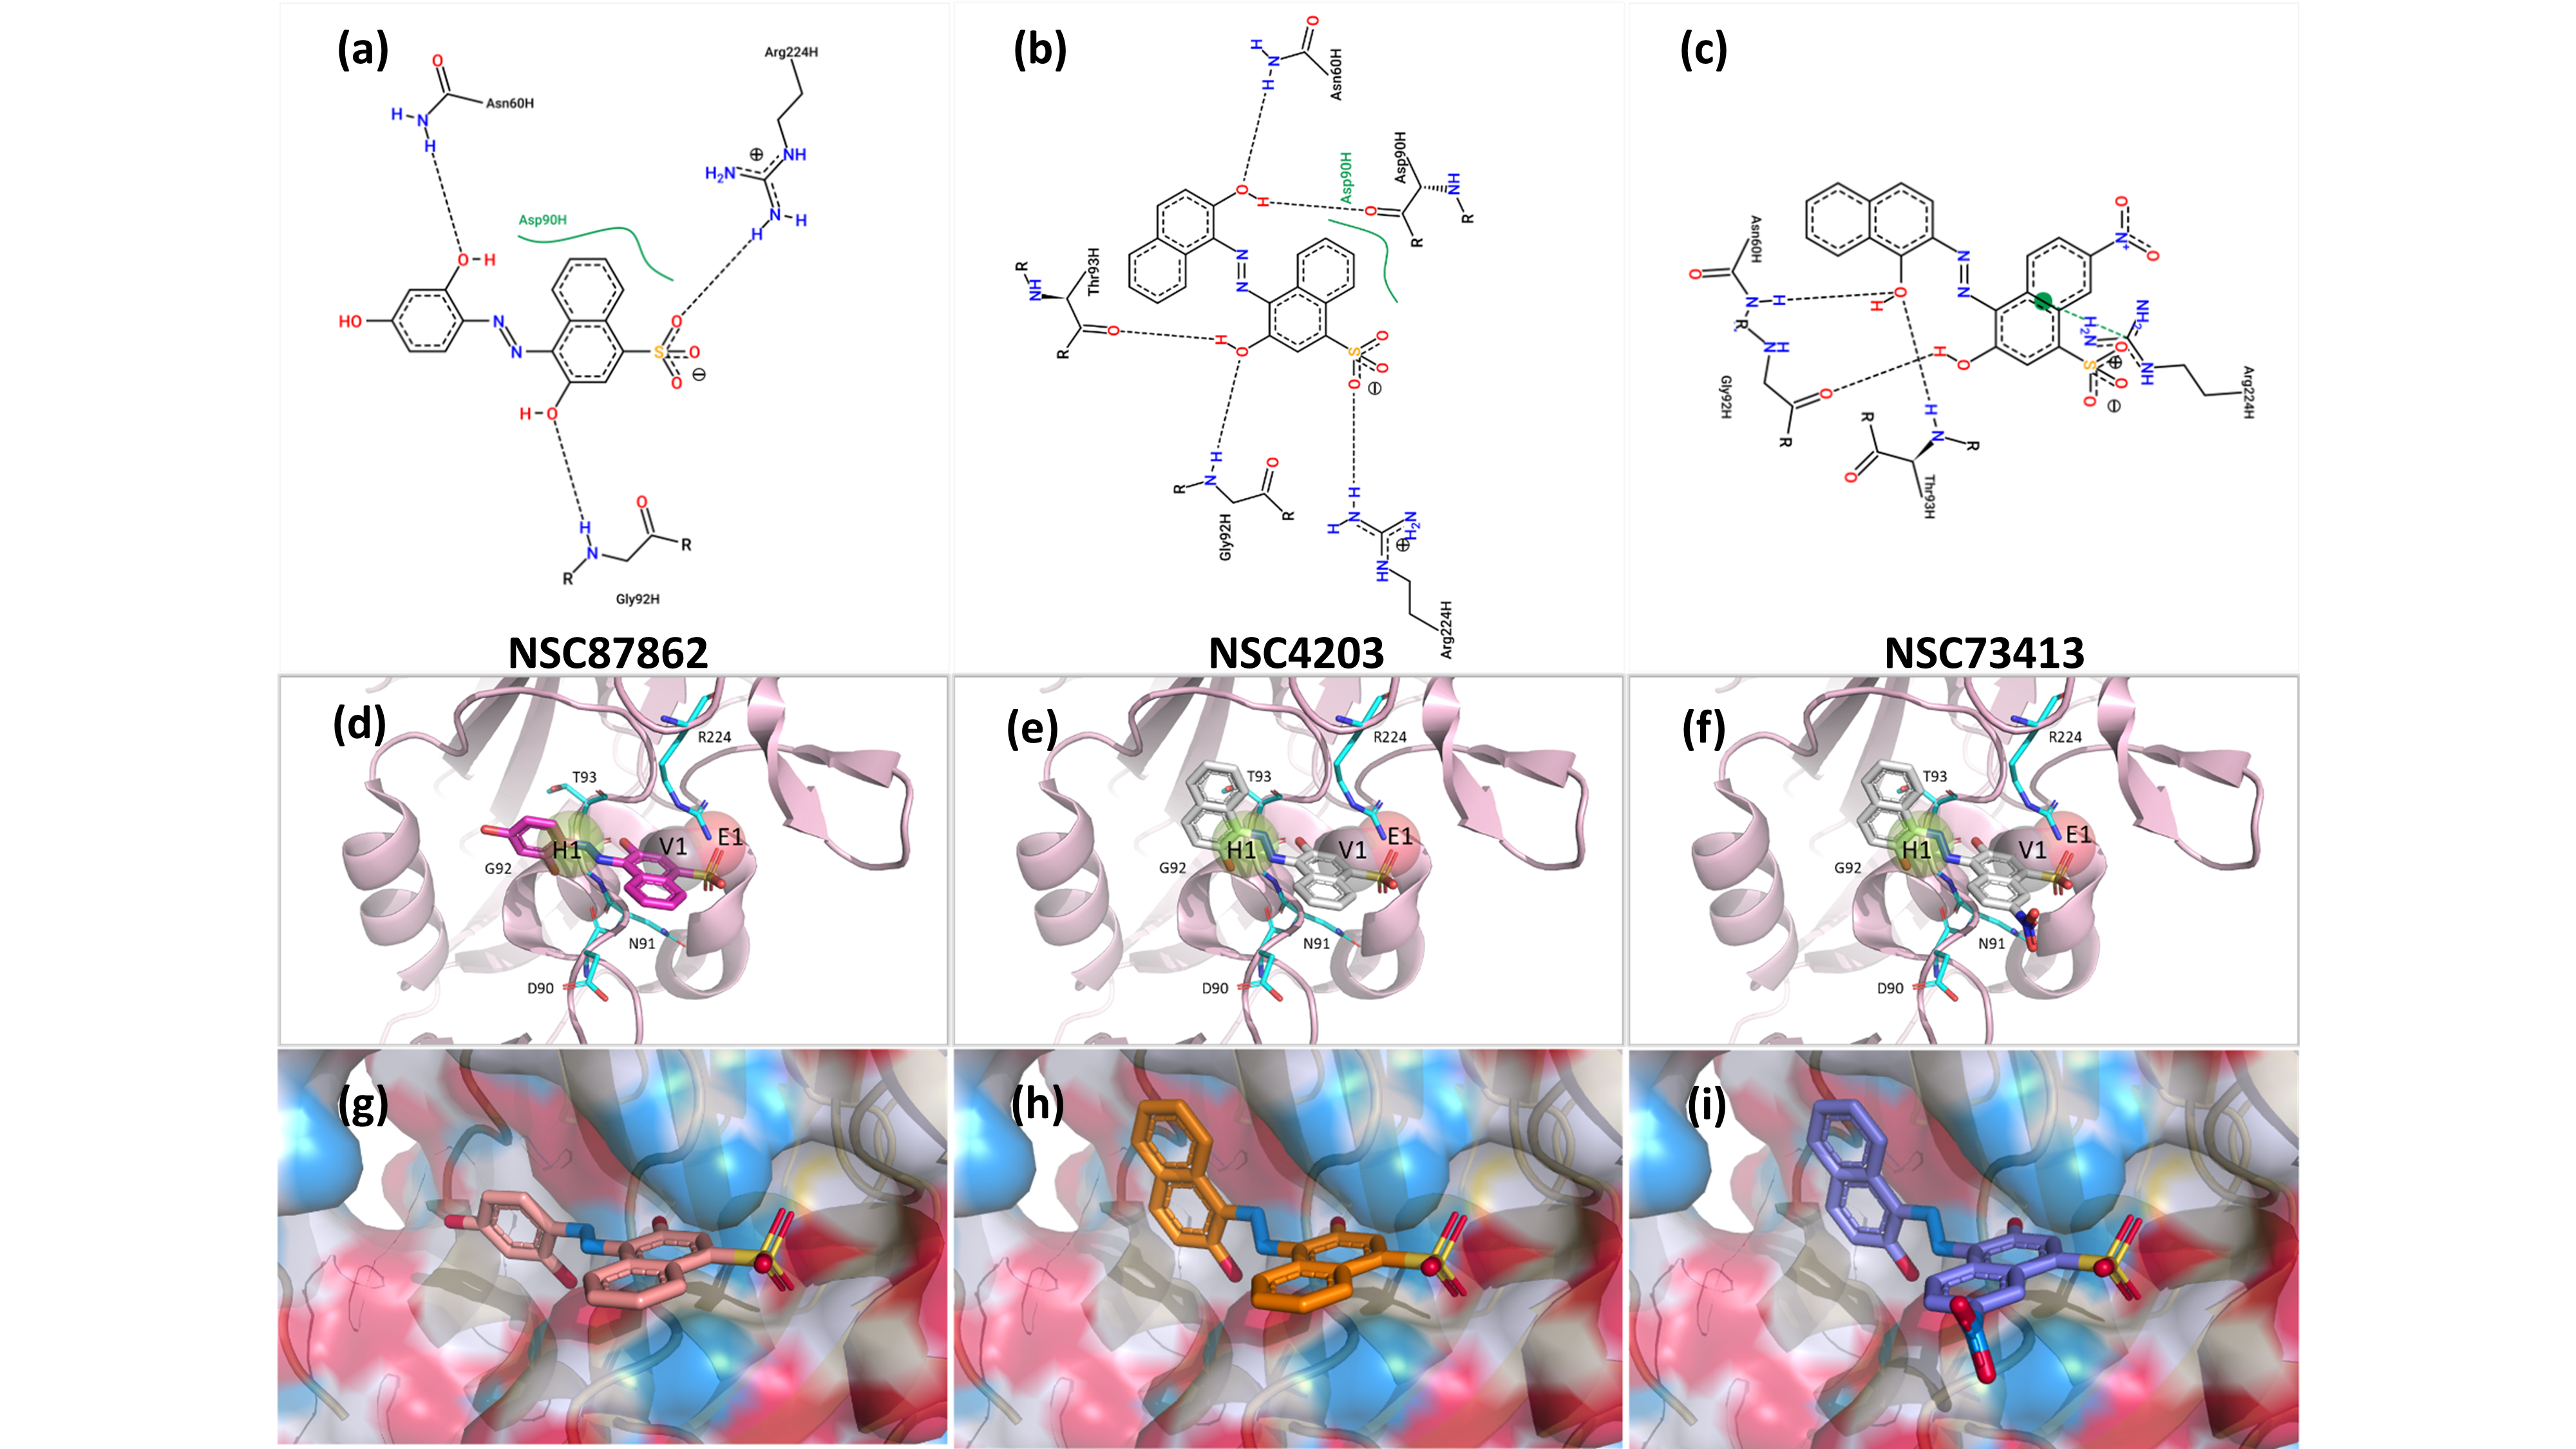


**Figure S1 Docked compounds show a high affinity toward the RBS in HA.**

The docked compounds **(a, d, g)** NSC87862, **(b, e, h)** NSC4203, and **(c, f, i)** NSC73413 are displayed in different visualization modes. **(a-c)** The interaction diagrams between docked compounds and protein are shown in 2D plots by the PROTEINS PLUS server26. **(d-f)** Visualization of the docked compounds with anchors in RBS of HA. HA is shown in the cartoon, anchors are shown as transparent spheres, interactive residues are shown as cyan sticks, and the docked compounds are shown as grey sticks. **(g-i)** The docked compounds in the RBS with surface mode. PyMOL software was used to draw all the 3D figures.
